# Supplementary material for: Mass Spectrometry-Based Proteomic Profiling of a Silvaner White Wine
Source: MDPI journal article supplement (doi:10.3390/biom13040650), 2023-04-04
Supplement: s1 [file s1]

**Table S1.** Comparison of proteins from the same Silvaner wine identified in the present study and proteins from a Silvaner wine identified by Albuquerque *et al.* [32].

| Proteins identified in both studies                                                 | Proteins identified only by Albuquerque et al. [32]                               |
|-------------------------------------------------------------------------------------|-----------------------------------------------------------------------------------|
| <b>High-Abundance proteins</b>                                                      | <b>Low-Abundance proteins</b>                                                     |
| Class IV chitinase (27.5 kDa, <i>Vitis vinifera</i> )                               | Aspartyl protease family protein 1 (23.7 kDa, <i>Vitis vinifera</i> )             |
| Glucan endo-1,3- $\beta$ -glucosidase (23.9 kDa, <i>Vitis vinifera</i> )            | Nucleoside diphosphate kinase (54.6 kDa, <i>Vitis vinifera</i> )                  |
| $\beta$ -fructofuranosidase, soluble isoenzyme I (36.8 kDa, <i>Vitis vinifera</i> ) | Putative glutathione S-transferase (11.7 kDa, <i>Vitis vinifera</i> )             |
| Non-specific lipid-transfer protein (63.5 kDa, <i>Vitis vinifera</i> )              | Aquaporin PIP2-2 (37.7 kDa, <i>Vitis vinifera</i> )                               |
| Thaumatococin-like protein (32 kDa, <i>Vitis vinifera</i> )                         | Barwin domain-containing protein (27.3 kDa, <i>Vitis vinifera</i> )               |
| Endochitinase EP3 (26 kDa, <i>Vitis vinifera</i> )                                  | Fructose-bisphosphate aldolase (14.1 kDa, <i>Vitis vinifera</i> )                 |
| <b>Low-Abundance proteins</b>                                                       | Tetraspanin-8 (82.4 kDa, <i>Vitis vinifera</i> )                                  |
| Plasma membrane ATPase (13.4 kDa, <i>Vitis vinifera</i> )                           | Protein kinase domain-containing protein (60.7 kDa, <i>Vitis vinifera</i> )       |
| Ubiquitin-60S ribosomal protein L40 (79.3 kDa, <i>Vitis vinifera</i> )              | Profilin-1 (41.9 kDa, <i>Vitis vinifera</i> )                                     |
| LysM domain-containing GPI-anchored protein 1 (34.4 kDa, <i>Vitis vinifera</i> )    | Early nodulin-like protein 2 (35.7 kDa, <i>Vitis vinifera</i> )                   |
|                                                                                     | 11S globulin seed storage protein 2 (33.7 kDa, <i>Vitis vinifera</i> )            |
|                                                                                     | Putative inactive receptor kinase (52 kDa, <i>Vitis vinifera</i> )                |
|                                                                                     | Tonoplast transporter 1 (16.9 kDa, <i>Vitis vinifera</i> )                        |
|                                                                                     | Pectinesterase/pectinesterase inhibitor 3 (42.4 kDa, <i>Vitis vinifera</i> )      |
|                                                                                     | Cysteine proteinase RD21A (30.7 kDa, <i>Vitis vinifera</i> )                      |
|                                                                                     | LysM domain-containing GPI-anchored protein 2 (105.9 kDa, <i>Vitis vinifera</i> ) |
|                                                                                     | Glycerophosphodiester phosphodiesterase GDPDL4 (69.5 kDa, <i>Vitis vinifera</i> ) |
|                                                                                     | Integrase catalytic domain-containing protein (112.2 kDa, <i>Vitis vinifera</i> ) |
|                                                                                     | X8 domain-containing protein (61.6 kDa, <i>Vitis vinifera</i> )                   |
|                                                                                     | PINc domain-containing protein (50.9 kDa, <i>Vitis vinifera</i> )                 |
|                                                                                     | Glyceraldehyde-3-phosphate dehydrogenase (104.7 kDa, <i>Vitis vinifera</i> )      |
|                                                                                     | Peroxidase (37.4 kDa, <i>Vitis vinifera</i> )                                     |
|                                                                                     | PI-PLC X domain-containing protein (80.1 kDa, <i>Vitis vinifera</i> )             |
|                                                                                     | Fasciclin-like arabinogalactan protein 10 (43.7 kDa, <i>Vitis vinifera</i> )      |
|                                                                                     | FAS1 domain-containing protein (16.3 kDa, <i>Vitis vinifera</i> )                 |
|                                                                                     | PMEI domain-containing protein (38.6 kDa, <i>Vitis vinifera</i> )                 |
|                                                                                     | Heat shock cognate 70 kDa protein (73.5 kDa, <i>Vitis vinifera</i> )              |
|                                                                                     | Expansin-like EG45 domain-containing protein (23.6 kDa, <i>Vitis vinifera</i> )   |

**Table S2.** Comparison of proteins from different white wines reported in the literature and identified in the present study. Bold marked proteins are found in all studies.

| Semillon                                          | German Portugieser                                    | Chardonnay                                        | Sauvignon Blanc                                                    |
|---------------------------------------------------|-------------------------------------------------------|---------------------------------------------------|--------------------------------------------------------------------|
| Marangon <i>et al.</i> [38]                       | Wigand <i>et al.</i> [15]                             | Cilindre <i>et al.</i> [22]                       | Kwon [30]                                                          |
| Class IV endochitinase ( <i>Vitis vinifera</i> )  | Class IV endochitinase ( <i>Vitis vinifera</i> )      | Class IV endochitinase ( <i>Vitis vinifera</i> )  | Acid phosphatase ( <i>Saccharomyces cerevisiae</i> )               |
|                                                   |                                                       | Endo-(1,3)-β-glucanase ( <i>Vitis vinifera</i> )  | Class IV endochitinase ( <i>Vitis vinifera</i> )                   |
|                                                   | Glycosidase ( <i>Saccharomyces cerevisiae</i> )       |                                                   | Endo-(1,3)-β-glucanase ( <i>Vitis vinifera</i> )                   |
|                                                   |                                                       |                                                   | Glycosidase ( <i>Saccharomyces cerevisiae</i> )                    |
| Thaumatins-like Protein ( <i>Vitis vinifera</i> ) | Thaumatins-like Protein ( <i>Vitis vinifera</i> )     | Thaumatins-like Protein ( <i>Vitis vinifera</i> ) | Target of Sbf ( <i>Saccharomyces cerevisiae</i> )                  |
| Vacuolar invertase ( <i>Vitis vinifera</i> )      | Vacuolar invertase ( <i>Vitis vinifera</i> )          | Vacuolar invertase ( <i>Vitis vinifera</i> )      | Thaumatins-like Protein ( <i>Vitis vinifera</i> )                  |
|                                                   | Cell wall protein ( <i>Saccharomyces cerevisiae</i> ) |                                                   | Vacuolar invertase ( <i>Vitis vinifera</i> )                       |
|                                                   | Lipid transfer protein ( <i>Vitis vinifera</i> )      |                                                   |                                                                    |
|                                                   |                                                       |                                                   | Daughter-specific cell protein ( <i>Saccharomyces cerevisiae</i> ) |

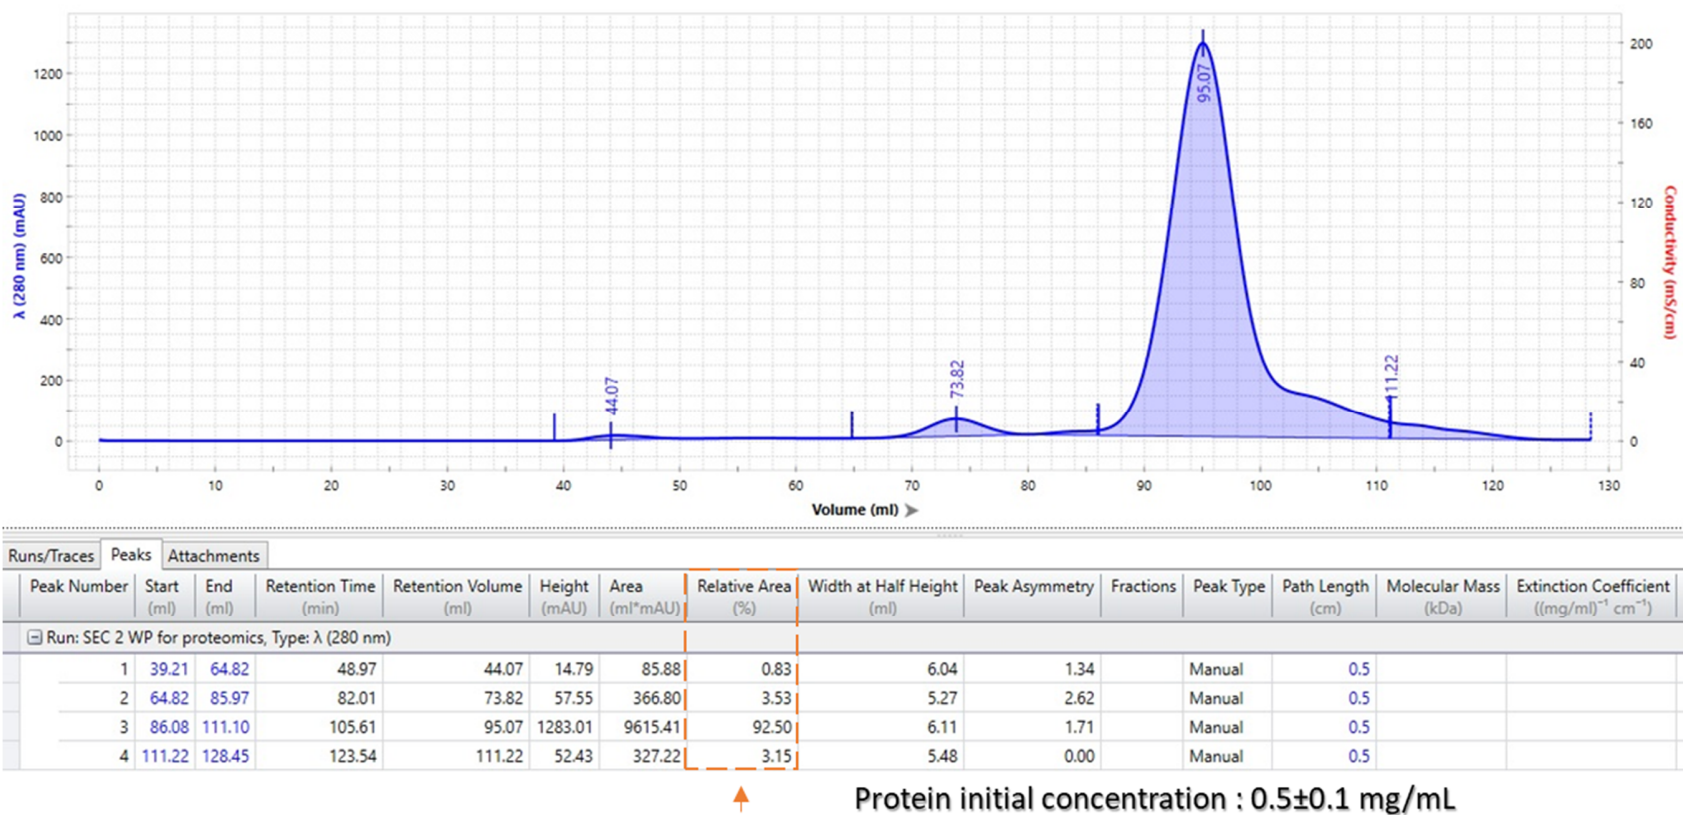

**Figure S1.** Quantification of the % of yield from the sample to protein fraction after FPLC fractionation based on the relative area calculated by the software ChromLab v6.1.29).
